# Supplementary material for: Sinapultide-loaded lipid microbubbles and the stabilization effect of sinapultide on the shells of lipid microbubbles
Source: Royal Society of Chemistry journal article supplement (doi:10.1039/c7tb02799k), 2018-01-01
Supplement: c7tb02799k1.pdf [file c7tb02799k1.pdf]

**Supporting Information:**

**Sinapultide-loaded lipid microbubbles and the stabilization effect of  
sinapultide on the shell of lipid**

Dong Liu<sup>#a, b</sup>, Zuoheng Zhang<sup>#a</sup>, Zhiguo Qin<sup>a</sup>, Jing Xing<sup>a</sup>, Yang Liu<sup>a</sup>, Juan Jin<sup>a</sup>, Fang  
Yang<sup>\*a</sup>, and Ning Gu<sup>\*a</sup>

<sup>a</sup>State Key Laboratory of Bioelectronics and Jiangsu Key Laboratory for Biomaterials and Devices, School of Biological Science and Medical Engineering, Southeast University, Nanjing, 210096, PR China; <sup>b</sup>School of Biology and Pharmaceutical Engineering, West Anhui University, Lu'an, P.R. China

\*Corresponding authors: Southeast University, State Key Laboratory of Bioelectronics, Jiangsu Key Laboratory for Biomaterials and Devices, School of Biological Sciences and Medical Engineering, Nanjing 210009, China. Tel: +86 25 83272460. E-mail addresses: yangfang2080@seu.edu.cn (F. Yang), guning@seu.edu.cn (N. Gu).

<sup>#</sup>These authors contributed equally to this work.

**Table S1.** The number ratio comparison of sinapultide to lipid between simulation and experiment.

| Agents      | Simulation |                                  | Experiments          |                                  |
|-------------|------------|----------------------------------|----------------------|----------------------------------|
|             | Number     | Sinapultide/lipid number ratio** | Number*              | Sinapultide/lipid number ratio** |
| DPPC        | 300        |                                  |                      |                                  |
| POPG Na     | 92         |                                  |                      |                                  |
| Total lipid | 392        |                                  | 1.6×10 <sup>7</sup>  |                                  |
| Sinapultide | 0          | <b>0</b>                         | 0                    | <b>0</b>                         |
|             | 2          | <b>0.0051</b>                    | 6.06×10 <sup>4</sup> | <b>0.0038</b>                    |
|             | 4          | <b>0.010</b>                     | 1.41×10 <sup>5</sup> | <b>0.0088</b>                    |
|             | 8          | <b>0.020</b>                     | 3.00×10 <sup>5</sup> | <b>0.019</b>                     |
|             | 16         | <b>0.041</b>                     | 6.64×10 <sup>5</sup> | <b>0.042</b>                     |
|             | 24         | <b>0.061</b>                     | 1.47×10 <sup>6</sup> | <b>0.092</b>                     |

\*\*Note: The sinapultide number was calculated according to the experimental result in the following derivation process(1).

\*Note: The sinapultide/ lipid number ration was caculated as equation (1):

$$\text{Number ratio} = \frac{\text{Number}_{\text{Sinapultide}}}{\text{Number}_{\text{total lipid}}} \quad (1)$$

Derivation process of sinapultide number caculation according to the experimental result:

Based on the surface area of one PC molecule ( $A_0 = 0.65 \text{ nm}^2$ ), the determined size of sinapultide loaded microbubbles ( $r = 1820/2 \text{ nm}$ ), The count of phospholipids in a monolayer encapsulated bubble ( $N_{\text{lipid}}$ ) was calculated using the follow equation (2):

$$N_{\text{lipid}} = 4\pi r^2 / A_0 \quad (2)$$

Thus, the total phospholipids numbers for one microubbble are  $1.60 \times 10^7$ .

And the number of sinapultide in one microbubbles was calculated using the follow equation (3):

$$N_1 = \left( \frac{C \times V \times LCs}{M_w} \times N_A \right) / C_{MBs} \quad (3)$$

where, C was added sinapultide concentration in the solution. V was the volume of the solution, LCs was the sinapultide loading capacity (mass %),  $M_w$  was the molecular weight of sinapultide (2466), and  $N_A$  was the Avogadro's constant, equally to  $6.02 \times 10^{23}$ . The  $C_{MBs}$  was the concentration of the prepared MBs in the experiment, which is measured as  $6.37 \times 10^9$ .

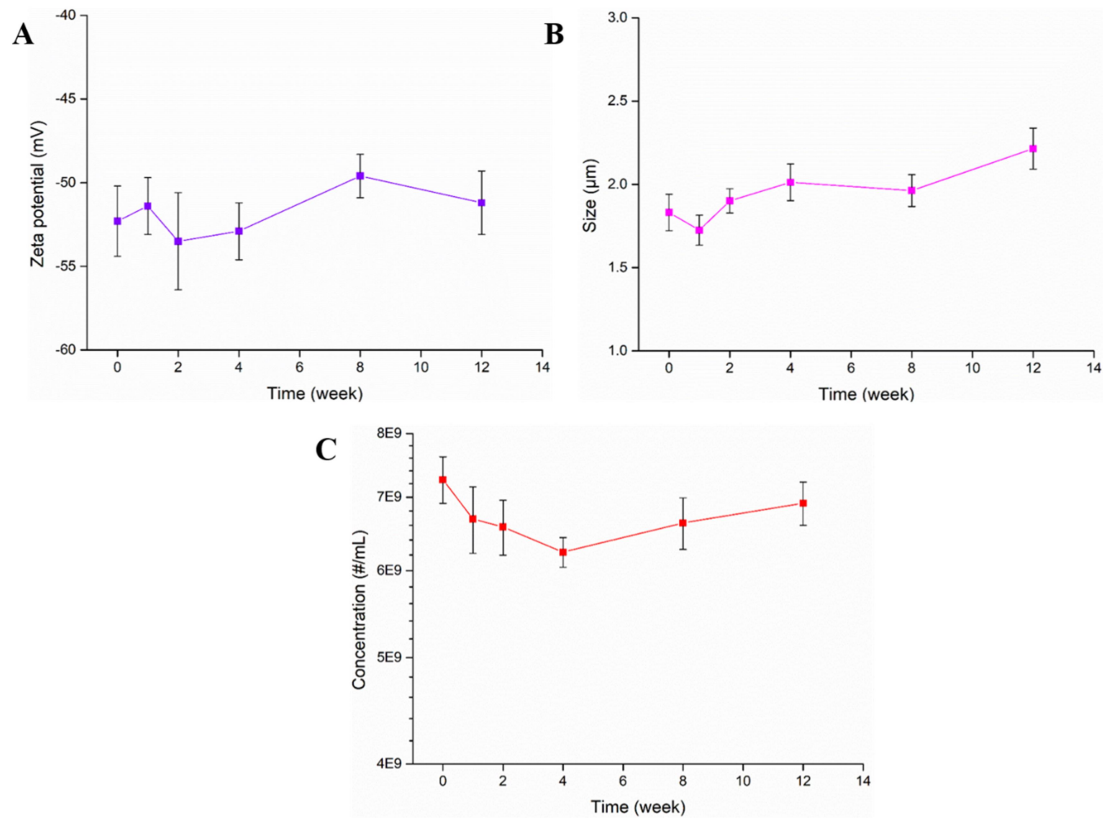

**Fig. S1** Stability test for (a) zeta potential, (b) mean diameter, and (c) microbubble yields of microbubble with the sinapultide concentration of 0.1 mg/mL after keeping mother liquor of sinapultide suspension in different period.

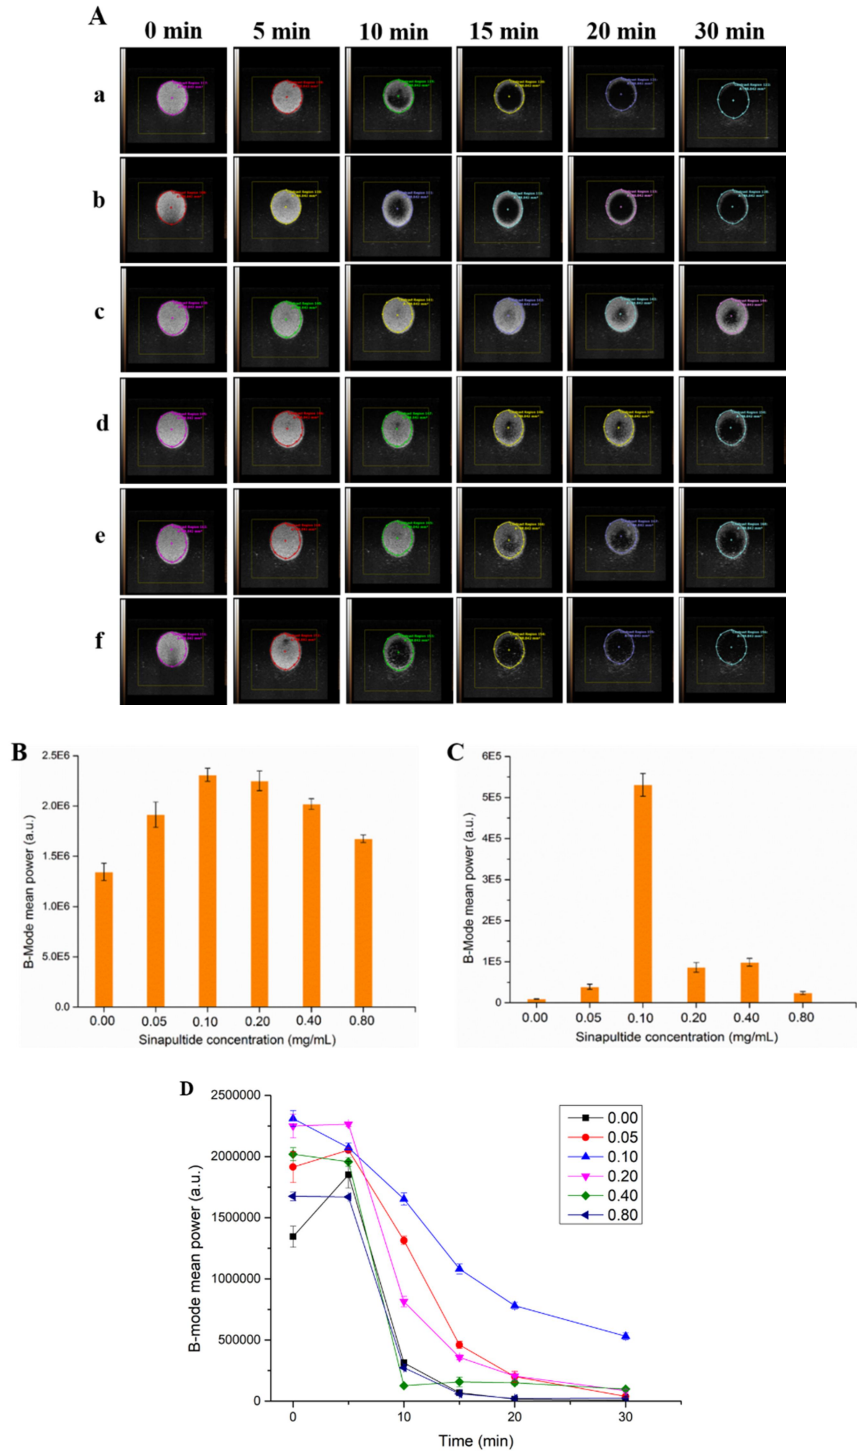

**Fig. S2** Ultrasonic evaluation in vitro of sinapultide-loaded lipid microbubbles. (A) The images of the six groups at different period, and the formulations with different concentrations of sinapultide for a-f are 0.0, 0.05, 0.10, and 0.20, 0.40 and 0.80 mg/mL, respectively. All samples were diluted 40 times. The B-mode mean power change of microbubbles after 0 min (B) and 30 mins (C). Average mean B-mode enhanced grayscale of US imaging to sinapultide microbubble of different concentrations at different time courses (0, 5, 10, 15, 20, 30 min) (D).
